# Supplementary material for: High Incidence of Candidemia in Critically Ill COVID-19 Patients Supported by Veno-Venous Extracorporeal Membrane Oxygenation: A Retrospective Study
Source: MDPI journal article supplement (doi:10.3390/jof9010119), 2023-01-14
Supplement: s1 [file s1]

**Supplementary Table S1:** Multivariable competing risk Fine Gray regression model for candidaemia without Propensity Score (among the patients admitted to the intensive care unit of Policlinico Umberto I teaching hospital of Rome between March 2020 and June 2021 and who underwent intubation and mechanical ventilation).

|                                                                                                                                                              | <b>Candidaemia</b>   |                       |
|--------------------------------------------------------------------------------------------------------------------------------------------------------------|----------------------|-----------------------|
|                                                                                                                                                              | <b>aSHR (95% CI)</b> | <b><i>p</i>-value</b> |
| ECMO support                                                                                                                                                 | 2.31 (1.15-4.64)     | 0.019                 |
| Non-candidaemic BSI                                                                                                                                          | 1.61 (0.22-1.63)     | 0.353                 |
| Tocilizumab therapy                                                                                                                                          | 0.60 (0.22-1.63)     | 0.319                 |
| Inotropes Therapy                                                                                                                                            | 0.97 (0.29-3.18)     | 0.957                 |
| Vasopressor Therapy                                                                                                                                          | 0.19 (0.08-0.44)     | <0.001                |
| Candida score                                                                                                                                                | 2.88 (2.19-3.79)     | <0.001                |
| aSHR: Adjusted Subdistribution Hazard Ratio; CI: Confidence Interval. ECMO: Extracorporeal Membrane Oxygenation; BSI: Blood Stream Infection; Ref; reference |                      |                       |

**Supplementary Table S2.** Multivariable logistic regression models for candidaemia stratified on ECMO support (among the patients admitted to the intensive care unit of Umberto I teaching hospital of Rome between March 2020 and June 2021 and who underwent IOT and mechanical ventilation)

|                                                                                                                                                               | Candidaemia         |                 |                   |                 |
|---------------------------------------------------------------------------------------------------------------------------------------------------------------|---------------------|-----------------|-------------------|-----------------|
|                                                                                                                                                               | ECMO support        |                 | No ECMO support   |                 |
|                                                                                                                                                               | aSHR (95% CI)       | <i>p</i> -value | aSHR (95% CI)     | <i>p</i> -value |
| Age                                                                                                                                                           |                     |                 |                   |                 |
| <62 years                                                                                                                                                     | Ref.                |                 | Ref.              |                 |
| >62 years                                                                                                                                                     | 0.91 (0.80-1.04)    | 0.171           | 0.97 (0.92-1.03)  | 0.355           |
| Gender                                                                                                                                                        |                     |                 |                   |                 |
| Male                                                                                                                                                          | Ref.                |                 | Ref.              |                 |
| Female                                                                                                                                                        | 0.33 (0.20-5.34)    | 0.433           | 2.71 (0.69-10.61) | 0.152           |
| Non-candidaemic BSI                                                                                                                                           | 0.02 (0.01-3.42)    | 0.135           | 4.94 (1.22-20.02) | 0.025           |
| Candida score                                                                                                                                                 | 27.43 (1.79-419.98) | 0.017           | 2.14 (1.14-10.61) | 0.017           |
| ECMO length, days                                                                                                                                             | 0.94 (0.80-1.11)    | 0.474           | --                | --              |
| aSHR: Adjusted Subdistribution Hazard Ratio; CI: Confidence Interval. ECMO: Extracorporeal Membrane Oxygenation; BSI: Blood Stream Infection; Ref; reference. |                     |                 |                   |                 |
